# Supplementary material for: Designing microbial communities to maximize the thermodynamic driving force for the production of chemicals
Source: PubMed Central journal article supplement (PMC8232427; doi:10.1371/journal.pcbi.1009093), 2021-06-15
Supplement: pcbi.1009093.s003.pdf [file pcbi.1009093.s003.pdf]

# Designing Microbial Communities to Maximize the Thermodynamic Driving Force for the Production of Chemicals

## S3 Text

Pavlos Stephanos Bekiaris<sup>1</sup> and Steffen Klamt<sup>2,\*</sup>

<sup>1</sup>Max Planck Institute for Dynamics of Complex Technical Systems, Magdeburg, Germany

<sup>2</sup>Max Planck Institute for Dynamics of Complex Technical Systems, Magdeburg, Germany

\* [klamt@mpi-magdeburg.de](mailto:klamt@mpi-magdeburg.de)

## ASTHERISC report for the toy model

The following text shows the ASTHERISC report generated for the community solution of the toy model (see Fig. 2 and Results section in the main text). The corresponding file can also be found in the ASTHERISC package's GitHub repository.

```
==TARGET WITH COMMUNITY ADVANTAGE: R_EX_C_P_exchg==  
Optimal yield without community and with deactivated dG0=NaN reactions without any  
MDF constraint [in mol/mol]: 1  
Optimal yield without community without any MDF constraint [in mol/mol]: 1  
Optimal MDF without community with minimal necessary yield as minimal yield  
constraint [in kJ/mol]: -0.19137  
Reached yield without community at optimal MDF solution (this yield is a lower bound)  
[in mol/mol]: 1  
Optimal MDF with community with minimal necessary yield as minimal yield constraint  
(if no warning given) [in kJ/mol]: 0.46467  
Approximated optimal yield with community at maximal community MDF (if no warning  
given) [in mol/mol]: 1  
Number of active metabolites: 11
```

```
Number of active reactions | Total absolute flux per species [in mmol/(gDW*h)]; Both  
with minimal absolute flux sum solution and substrate uptake scaled to maximum:  
strain1: 2 | 2  
strain2: 2 | 2
```

```
Extra exchanges and scaled flux [in mmol/(gDW*h)] with minimal absolute flux solution  
(negative flux means uptake to species, positive flux secretion from species)  
and associated metabolites with concentrations in M:  
R_EXCHG_strain1_B_c_to_B | SCALED FLUX: 1 | M_B_c_strain1 [8.5268;8.5308] | M_B_exchg  
[7.0694;7.0727]  
R_EXCHG_strain2_B_c_to_B | SCALED FLUX: -1 | M_B_c_strain2 [5.8611;5.8639] |  
M_B_exchg [7.0694;7.0727]
```

```
Metabolites with non-overlapping concentration ranges between species [concentrations  
are given in M]:
```

```
M_X_c_strain1 [1;1.3689] & M_X_c_strain2 [3.6525;10]  
M_B_c_strain1 [8.5268;8.5308] & M_B_c_strain2 [5.8611;5.8639]  
M_S_c_strain1 [8.2869;8.2908] & M_S_c_strain2 [unused]  
M_C_c_strain1 [unused] & M_C_c_strain2 [3.6525;10]  
M_P_c_strain1 [unused] & M_P_c_strain2 [6.0308;6.0336]
```

```
Bottleneck reactions (driving force=OptMDF) of single-species solution as calculated  
back from community solution:
```

```
MDF in single species with reactions occurring in community solution [in kJ/mol]: -  
0.19137 (OptMDF in community was 0.46467 kJ/mol, difference is 0.65605 kJ/mol)
```

```
>Bottleneck reactions (driving force=OptMDF):
```

```
R_S_to_A_strain1 | 1 M_S_c_strain1 -> 1 M_A_c_strain1 + 1 M_X_c_strain1
```

```
R_C_to_P_strain1 | 1 M_X_c_strain1 + 1 M_C_c_strain1 -> 1 M_P_c_strain1
```

```
R_EXCHG_strain1_P_c_to_P | 1 M_P_c_strain1 (<)-> 1 M_P_exchg
```

```
>Connecting metabolites:
```

```
R_S_to_A_strain1-> R_C_to_P_strain1; M_X_c_strain1
```

```
R_C_to_P_strain1-> R_EXCHG_strain1_P_c_to_P; M_P_c_strain1
```

>Connecting metabolite concentration ranges [in M]:

-M\_X\_c\_strain1~

In single species:

[2.1514;2.1514] (range 4.9829e-05)

In community:

M\_X\_c\_strain1: [1;1.3689] (range 0.36894)

M\_X\_c\_strain2: [3.6525;10] (range 6.3475)

-M\_P\_c\_strain1~

In single species:

[4.6285;4.6286] (range 0.0001072)

In community:

M\_P\_c\_strain1: [unused] (range 0)

M\_P\_c\_strain2: [6.0308;6.0336] (range 0.0028514)

Detailed reaction-wise solution reports:

-Detailed solution of community solution-

Active reactions associated with species strain1 (Reaction ID; Flux [in mmol/(gDW\*h)]; Direction; dGO (adjusted to direction) [in kJ/mol]; dG [in kJ/mol];

Reaction string (adjusted to direction):

S\_to\_A\_strain1; 1; forward; 4; -0.46467; 1 M\_S\_c\_strain1 -> 1 M\_A\_c\_strain1 + 1

M\_X\_c\_strain1

A\_to\_B\_strain1; 1; forward; -5; -0.46548; 1 M\_A\_c\_strain1 + 1 M\_X\_c\_strain1 -> 1

M\_B\_c\_strain1

EXCHG\_strain1\_S\_c\_to\_S; -1; reverse; 0; -0.46467; 1 M\_S\_exchg (<)-> 1 M\_S\_c\_strain1

EXCHG\_strain1\_B\_c\_to\_B; 1; forward; 0; -0.46467; 1 M\_B\_c\_strain1 -> 1 M\_B\_exchg

Active reactions associated with species strain2 (Reaction ID; Flux [in mmol/(gDW\*h)]; Direction; dGO (adjusted to direction) [in kJ/mol]; dG [in kJ/mol];

Reaction string (adjusted to direction):

B\_to\_C\_strain2; 1; forward; -5; -0.46467; 1 M\_B\_c\_strain2 -> 1 M\_X\_c\_strain2 + 1

M\_C\_c\_strain2

C\_to\_P\_strain2; 1; forward; 4; -0.46467; 1 M\_X\_c\_strain2 + 1 M\_C\_c\_strain2 -> 1

M\_P\_c\_strain2

EXCHG\_strain2\_P\_c\_to\_P; 1; forward; 0; -0.46467; 1 M\_P\_c\_strain2 (<)-> 1 M\_P\_exchg

EXCHG\_strain2\_B\_c\_to\_B; -1; reverse; 0; -0.46467; 1 M\_B\_exchg -> 1 M\_B\_c\_strain2

Active reactions of exchange compartment<->environment exchange reactions:

EX\_C\_S\_exchg; -1; reverse; NaN; NaN; (<)-> 1 M\_S\_exchg

EX\_C\_P\_exchg; 1; forward; NaN; NaN; 1 M\_P\_exchg ->

-Detailed solution of single-strain solution (recalculated back from community solution reactions)-

Active reactions associated with species strain1 (Reaction ID; Flux [in mmol/(gDW\*h)]; Direction; dGO (adjusted to direction) [in kJ/mol]; dG [in kJ/mol];

Reaction string (adjusted to direction):

S\_to\_A\_strain1; 1; forward; 4; 0.19137; 1 M\_S\_c\_strain1 -> 1 M\_A\_c\_strain1 + 1

M\_X\_c\_strain1

A\_to\_B\_strain1; 1; forward; -5; -3.6068; 1 M\_A\_c\_strain1 + 1 M\_X\_c\_strain1 -> 1

M\_B\_c\_strain1

B\_to\_C\_strain1; 1; forward; -5; -0.68555; 1 M\_B\_c\_strain1 -> 1 M\_X\_c\_strain1 + 1

M\_C\_c\_strain1

C\_to\_P\_strain1; 1; forward; 4; 0.19137; 1 M\_X\_c\_strain1 + 1 M\_C\_c\_strain1 -> 1

M\_P\_c\_strain1

EXCHG\_strain1\_P\_c\_to\_P; 1; forward; 0; 0.19137; 1 M\_P\_c\_strain1 (<)-> 1 M\_P\_exchg

EXCHG\_strain1\_S\_c\_to\_S; -1; reverse; 0; 0; 1 M\_S\_exchg (<)-> 1 M\_S\_c\_strain1

Active reactions of exchange compartment<->environment exchange reactions:

EX\_C\_S\_exchg; -1; reverse; NaN; NaN; (<)-> 1 M\_S\_exchg

EX\_C\_P\_exchg; 1; forward; NaN; NaN; 1 M\_P\_exchg ->
