# Supplementary material for: Designing microbial communities to maximize the thermodynamic driving force for the production of chemicals
Source: PubMed Central journal article supplement (PMC8232427; doi:10.1371/journal.pcbi.1009093), 2021-06-15
Supplement: pcbi.1009093.s004.pdf [file pcbi.1009093.s004.pdf]

# Designing Microbial Communities to Maximize the Thermodynamic Driving Force for the Production of Chemicals

## S4 Text

Pavlos Stephanos Bekiaris<sup>1</sup> and Steffen Klamt<sup>2,\*</sup>

<sup>1</sup>Max Planck Institute for Dynamics of Complex Technical Systems, Magdeburg, Germany

<sup>2</sup>Max Planck Institute for Dynamics of Complex Technical Systems, Magdeburg, Germany

\* [klamt@mpi-magdeburg.de](mailto:klamt@mpi-magdeburg.de)

## ASTHERISC report for the found community solution for kdo8p synthesis in *ecolicore2double*

The following text shows the ASTHERISC report generated for the community solution for the synthesis of 3-Deoxy-D-manno-octulosonate 8-phosphate (kdo8p) in *ecolicore2double* as discussed in the main text. The file can also be found in the ASTHERISC package's GitHub repository. [Note: The given warning for the approximation of the optimal yield does not mean that the computation failed, instead, it indicates that, with the given maximal yield approximation steps, no higher yield could be found.

```
==TARGET WITH COMMUNITY ADVANTAGE: R_EX_C_kdo8p_exchg==  
WARNING: Approximated optimal yield at approximated optimal MDF for the  
community could not be calculated, this is possible e.g. due to timeouts.  
Optimal yield without community and with deactivated dG0=NaN reactions  
without any MDF constraint [in mol/mol]: 0.74775  
Optimal yield without community without any MDF constraint [in mol/mol]:  
0.74775  
Optimal MDF without community with minimal necessary yield as minimal yield  
constraint [in kJ/mol]: 2.2737  
Reached yield without community at optimal MDF solution (this yield is a  
lower bound) [in mol/mol]: 0.74775  
Optimal MDF with community with minimal necessary yield as minimal yield  
constraint (if no warning given) [in kJ/mol]: 2.872  
Approximated optimal yield with community at maximal community MDF (if no  
warning given) [in mol/mol]: 0.73311  
Number of active metabolites: 73
```

```
Number of active reactions | Total absolute flux per species [in  
mmol/(gDW*h)]; Both with minimal absolute flux sum solution and substrate  
uptake scaled to maximum:  
ecoli1: 28 | 13.8547  
ecoli2: 16 | 4.3598
```

Extra exchanges and scaled flux [in mmol/(gDW\*h)] with minimal absolute flux solution (negative flux means uptake to species, positive flux secretion from species)

```
and associated metabolites with concentrations in M:  
R_EXCHG_ecoli1_kdo8p_c_to_kdo8p | SCALED FLUX: 0.73311 | M_kdo8p_c_ecoli1  
[3.1852e-06; 0.02] | M_kdo8p_exchg [1e-06; 0.0062791]  
R_EXCHG_ecoli1_6pgc_c_to_6pgc | SCALED FLUX: -0.30068 | M_6pgc_c_ecoli1 [1e-  
06; 0.00074141] | M_6pgc_exchg [3.1852e-06; 0.0023615]  
R_EXCHG_ecoli1_dha_c_to_dha | SCALED FLUX: 0.60135 | M_dha_c_ecoli1  
[0.00059826; 0.00059905] | M_dha_exchg [0.00018783; 0.00018808]  
R_EXCHG_ecoli2_6pgc_c_to_6pgc | SCALED FLUX: 0.30068 | M_6pgc_c_ecoli2  
[1.0145e-05; 0.0075218] | M_6pgc_exchg [3.1852e-06; 0.0023615]  
R_EXCHG_ecoli2_dha_c_to_dha | SCALED FLUX: -0.60135 | M_dha_c_ecoli2  
[5.8969e-05; 5.9048e-05] | M_dha_exchg [0.00018783; 0.00018808]
```

Metabolites with non-overlapping concentration ranges between species  
[concentrations are given in M]:

M\_dha\_c\_ecoli1 [0.00059826; 0.00059905] & M\_dha\_c\_ecoli2 [5.8969e-05; 5.9048e-05]  
M\_f6p\_c\_ecoli1 [0.00037078; 0.00037128] & M\_f6p\_c\_ecoli2 [1e-06; 1.0027e-06]  
M\_g3p\_c\_ecoli1 [0.00032482; 0.00032525] & M\_g3p\_c\_ecoli2 [9.0047e-05; 9.0286e-05]  
M\_g6p\_c\_ecoli1 [0.019973; 0.02] & M\_g6p\_c\_ecoli2 [1.9629e-06; 5.3238e-06]  
M\_13dpg\_c\_ecoli1 [1e-06; 1e-06] & M\_13dpg\_c\_ecoli2 [unused]  
M\_2ddg6p\_c\_ecoli1 [1e-06; 0.02] & M\_2ddg6p\_c\_ecoli2 [unused]  
M\_2pg\_c\_ecoli1 [1e-06; 1.2863e-05] & M\_2pg\_c\_ecoli2 [unused]  
M\_3pg\_c\_ecoli1 [1.9729e-05; 0.00025378] & M\_3pg\_c\_ecoli2 [unused]  
M\_6pgl\_c\_ecoli1 [unused] & M\_6pgl\_c\_ecoli2 [1e-06; 2.7122e-06]  
M\_amp\_c\_ecoli1 [1e-06; 0.013333] & M\_amp\_c\_ecoli2 [unused]  
M\_ara5p\_c\_ecoli1 [1e-06; 3.8739e-06] & M\_ara5p\_c\_ecoli2 [unused]  
M\_co2\_c\_ecoli1 [1e-06; 0.001] & M\_co2\_c\_ecoli2 [unused]  
M\_dhap\_c\_ecoli1 [unused] & M\_dhap\_c\_ecoli2 [0.002719; 0.0027262]  
M\_e4p\_c\_ecoli1 [4.1645e-06; 0.0002421] & M\_e4p\_c\_ecoli2 [unused]  
M\_fdp\_c\_ecoli1 [unused] & M\_fdp\_c\_ecoli2 [0.0065364; 0.0065712]  
M\_glc\_D\_c\_ecoli1 [4.6483e-06; 0.0062791] & M\_glc\_D\_c\_ecoli2 [unused]  
M\_glyc3p\_c\_ecoli1 [unused] & M\_glyc3p\_c\_ecoli2 [1e-06; 0.02]  
M\_kdo8p\_c\_ecoli1 [3.1852e-06; 0.02] & M\_kdo8p\_c\_ecoli2 [unused]  
M\_pep\_c\_ecoli1 [1e-06; 1.8788e-05] & M\_pep\_c\_ecoli2 [unused]  
M\_pyr\_c\_ecoli1 [1e-06; 0.02] & M\_pyr\_c\_ecoli2 [unused]  
M\_r5p\_c\_ecoli1 [2.2402e-05; 0.0013023] & M\_r5p\_c\_ecoli2 [unused]  
M\_ru5p\_D\_c\_ecoli1 [1.1864e-06; 4.5958e-06] & M\_ru5p\_D\_c\_ecoli2 [unused]  
M\_s7p\_c\_ecoli1 [6.0694e-06; 0.00035284] & M\_s7p\_c\_ecoli2 [unused]  
M\_xu5p\_D\_c\_ecoli1 [1.4823e-05; 0.00011302] & M\_xu5p\_D\_c\_ecoli2 [unused]  
M\_co2\_p\_ecoli1 [3.1852e-06; 0.001] & M\_co2\_p\_ecoli2 [unused]  
M\_glc\_D\_p\_ecoli1 [1.4805e-05; 0.02] & M\_glc\_D\_p\_ecoli2 [unused]

Bottleneck reactions (maximal driving force in order to reach OptMDF is equal to OptMDF) of community solution:

>Bottleneck reactions (maximal driving force in order to reach OptMDF is equal to OptMDF):

R\_F6PA\_ecoli1 | 1 M\_f6p\_c\_ecoli1 (<)-> 1 M\_dha\_c\_ecoli1 + 1 M\_g3p\_c\_ecoli1  
R\_GAPD\_ecoli1 | 1 M\_g3p\_c\_ecoli1 + 1 M\_nad\_c\_ecoli1 + 1 M\_pi\_c\_ecoli1 (<)-> 1  
M\_13dpg\_c\_ecoli1 + 1 M\_h\_c\_ecoli1 + 1 M\_nadh\_c\_ecoli1  
R\_PGI\_ecoli1 | 1 M\_g6p\_c\_ecoli1 (<)-> 1 M\_f6p\_c\_ecoli1  
R\_Plt2rpp\_ecoli1 | 1 M\_h\_p\_ecoli1 + 1 M\_pi\_p\_ecoli1 (<)-> 1 M\_h\_c\_ecoli1 + 1  
M\_pi\_c\_ecoli1  
R\_F6PA\_ecoli2 | 1 M\_g3p\_c\_ecoli2 + 1 M\_dha\_c\_ecoli2 (<)-> 1 M\_f6p\_c\_ecoli2  
R\_FBA\_ecoli2 | 1 M\_fdp\_c\_ecoli2 (<)-> 1 M\_g3p\_c\_ecoli2 + 1 M\_dhap\_c\_ecoli2  
R\_PFK\_ecoli2 | 1 M\_atp\_c\_ecoli2 + 1 M\_f6p\_c\_ecoli2 -> 1 M\_adp\_c\_ecoli2 + 1  
M\_h\_c\_ecoli2 + 1 M\_fdp\_c\_ecoli2  
R\_TPI\_ecoli2 | 1 M\_dhap\_c\_ecoli2 (<)-> 1 M\_g3p\_c\_ecoli2  
R\_EXCHG\_ecoli1\_dha\_c\_to\_dha | 1 M\_dha\_c\_ecoli1 (<)-> 1 M\_dha\_exchg  
R\_EXCHG\_ecoli2\_dha\_c\_to\_dha | 1 M\_dha\_exchg (<)-> 1 M\_dha\_c\_ecoli2

>Connecting metabolites:

R\_F6PA\_ecoli1-> R\_EXCHG\_ecoli1\_dha\_c\_to\_dha; M\_dha\_c\_ecoli1  
R\_PGI\_ecoli1-> R\_F6PA\_ecoli1; M\_f6p\_c\_ecoli1

R\_F6PA\_ecoli1-> R\_GAPD\_ecoli1; M\_g3p\_c\_ecoli1  
 R\_Plt2rpp\_ecoli1-> R\_GAPD\_ecoli1; M\_pi\_c\_ecoli1  
 R\_FBA\_ecoli2/R\_TPI\_ecoli2-> R\_F6PA\_ecoli2; M\_g3p\_c\_ecoli2  
 R\_F6PA\_ecoli2-> R\_PFK\_ecoli2; M\_f6p\_c\_ecoli2  
 R\_EXCHG\_ecoli2\_dha\_c\_to\_dha-> R\_F6PA\_ecoli2; M\_dha\_c\_ecoli2  
 R\_PFK\_ecoli2-> R\_FBA\_ecoli2; M\_fdp\_c\_ecoli2  
 R\_FBA\_ecoli2-> R\_TPI\_ecoli2; M\_dhap\_c\_ecoli2  
 R\_EXCHG\_ecoli1\_dha\_c\_to\_dha-> R\_EXCHG\_ecoli2\_dha\_c\_to\_dha; M\_dha\_exchg

Bottleneck reactions (driving force=OptMDF) of single-species solution as calculated back from community solution:

MDF in single species with reactions occurring in community solution [in kJ/mol]: 2.2737 (OptMDF in community was 2.872 kJ/mol, difference is 0.59831 kJ/mol)

>Bottleneck reactions (driving force=OptMDF):

R\_FBA\_ecoli1 | 1 M\_fdp\_c\_ecoli1 (<)-> 1 M\_dhap\_c\_ecoli1 + 1 M\_g3p\_c\_ecoli1  
 R\_GAPD\_ecoli1 | 1 M\_g3p\_c\_ecoli1 + 1 M\_nad\_c\_ecoli1 + 1 M\_pi\_c\_ecoli1 (<)-> 1  
 M\_13dpg\_c\_ecoli1 + 1 M\_h\_c\_ecoli1 + 1 M\_nadh\_c\_ecoli1  
 R\_Plt2rpp\_ecoli1 | 1 M\_h\_p\_ecoli1 + 1 M\_pi\_p\_ecoli1 (<)-> 1 M\_h\_c\_ecoli1 + 1  
 M\_pi\_c\_ecoli1  
 R\_TPI\_ecoli1 | 1 M\_dhap\_c\_ecoli1 (<)-> 1 M\_g3p\_c\_ecoli1

>Connecting metabolites:

R\_FBA\_ecoli1-> R\_TPI\_ecoli1; M\_dhap\_c\_ecoli1  
 R\_FBA\_ecoli1/R\_TPI\_ecoli1-> R\_GAPD\_ecoli1; M\_g3p\_c\_ecoli1  
 R\_Plt2rpp\_ecoli1-> R\_GAPD\_ecoli1; M\_pi\_c\_ecoli1

>Connecting metabolite concentration ranges [in M]:

~M\_dhap\_c\_ecoli1~

In single species:

[0.0047548; 0.0047574] (range 2.6175e-06)

In community:

M\_dhap\_c\_ecoli1: [unused] (range 0)

M\_dhap\_c\_ecoli2: [0.002719; 0.0027262] (range 7.2297e-06)

~M\_g3p\_c\_ecoli1~

In single species:

[0.00020045; 0.00020045] (range 0)

In community:

M\_g3p\_c\_ecoli1: [0.00032482; 0.00032525] (range 4.3155e-07)

M\_g3p\_c\_ecoli2: [9.0047e-05; 9.0286e-05] (range 2.3943e-07)

~M\_pi\_c\_ecoli1~

In single species:

[0.0079931; 0.0079931] (range 0)

In community:

M\_pi\_c\_ecoli1: [0.0062708; 0.0062791] (range 8.3314e-06)

M\_pi\_c\_ecoli2: [3.6645e-05; 0.0062791] (range 0.0062425)

Detailed reaction-wise solution reports:

~Detailed solution of community solution~

Active reactions associated with species ecoli1 (Reaction ID; Flux [in mmol/(gDW\*h)]; Direction; dG0 (adjusted to direction) [in kJ/mol]; dG [in kJ/mol]; Reaction string (adjusted to direction):

A5PIS0\_ecoli1; 0.73311; forward; -2.4481; -2.872; 1 M\_ru5p\_\_D\_c\_ecoli1 (<)->  
1 M\_ara5p\_c\_ecoli1  
ADK1\_ecoli1; 0.16554; forward; -0.19453; -4.636; 1 M\_amp\_c\_ecoli1 + 1  
M\_atp\_c\_ecoli1 (<)-> 2 M\_adp\_c\_ecoli1  
ATPS4rpp\_ecoli1; 0.76351; forward; -33.8921; -18.5988; 1 M\_adp\_c\_ecoli1 + 1  
M\_pi\_c\_ecoli1 + 4 M\_h\_p\_ecoli1 (<)-> 1 M\_atp\_c\_ecoli1 + 3 M\_h\_c\_ecoli1 + 1  
M\_h2o\_c\_ecoli1  
C02tpp\_ecoli1; -0.13514; reverse; NaN; NaN; 1 M\_co2\_c\_ecoli1 (<)-> 1  
M\_co2\_p\_ecoli1  
CYTB03\_4pp\_ecoli1; 0.7027; forward; -55.284; -50.4354; 4 M\_h\_c\_ecoli1 + 0.5  
M\_o2\_c\_ecoli1 + 1 M\_q8h2\_c\_ecoli1 -> 1 M\_h2o\_c\_ecoli1 + 1 M\_q8\_c\_ecoli1 + 4  
M\_h\_p\_ecoli1  
EDA\_ecoli1; 0.16554; forward; 16.2402; -13.0839; 1 M\_2ddg6p\_c\_ecoli1 -> 1  
M\_g3p\_c\_ecoli1 + 1 M\_pyr\_c\_ecoli1  
EDD\_ecoli1; 0.16554; forward; -42.8448; -24.0099; 1 M\_6pgc\_c\_ecoli1 -> 1  
M\_2ddg6p\_c\_ecoli1 + 1 M\_h2o\_c\_ecoli1  
ENO\_ecoli1; 0.56757; forward; -3.8109; -9.413; 1 M\_2pg\_c\_ecoli1 (<)-> 1  
M\_h2o\_c\_ecoli1 + 1 M\_pep\_c\_ecoli1  
F6PA\_ecoli1; 0.60135; forward; 15.8529; -2.872; 1 M\_f6p\_c\_ecoli1 (<)-> 1  
M\_dha\_c\_ecoli1 + 1 M\_g3p\_c\_ecoli1  
GAPD\_ecoli1; 0.56757; forward; 4.6027; -2.872; 1 M\_g3p\_c\_ecoli1 + 1  
M\_nad\_c\_ecoli1 + 1 M\_pi\_c\_ecoli1 (<)-> 1 M\_13dpg\_c\_ecoli1 + 1 M\_h\_c\_ecoli1 +  
1 M\_nadh\_c\_ecoli1  
GLCt2pp\_ecoli1; 1; forward; 0; -2.872; 1 M\_glc\_\_D\_p\_ecoli1 + 1 M\_h\_p\_ecoli1 -  
> 1 M\_glc\_\_D\_c\_ecoli1 + 1 M\_h\_c\_ecoli1  
GND\_ecoli1; 0.13514; forward; 10.332; -26.4811; 1 M\_6pgc\_c\_ecoli1 + 1  
M\_nadp\_c\_ecoli1 -> 1 M\_co2\_c\_ecoli1 + 1 M\_nadph\_c\_ecoli1 + 1  
M\_ru5p\_\_D\_c\_ecoli1  
H20tpp\_ecoli1; -1.3007; reverse; NaN; NaN; 1 M\_h2o\_c\_ecoli1 (<)-> 1  
M\_h2o\_p\_ecoli1  
HEX1\_ecoli1; 1; forward; -17.901; -17.7523; 1 M\_atp\_c\_ecoli1 + 1  
M\_glc\_\_D\_c\_ecoli1 -> 1 M\_adp\_c\_ecoli1 + 1 M\_g6p\_c\_ecoli1 + 1 M\_h\_c\_ecoli1  
KDOPS\_ecoli1; 0.73311; forward; -66.5142; -21.015; 1 M\_ara5p\_c\_ecoli1 + 1  
M\_h2o\_c\_ecoli1 + 1 M\_pep\_c\_ecoli1 -> 1 M\_kdo8p\_c\_ecoli1 + 1 M\_pi\_c\_ecoli1  
NADH16pp\_ecoli1; 0.7027; forward; -81.2018; -75.4941; 4 M\_h\_c\_ecoli1 + 1  
M\_nadh\_c\_ecoli1 + 1 M\_q8\_c\_ecoli1 (<)-> 1 M\_nad\_c\_ecoli1 + 1 M\_q8h2\_c\_ecoli1  
+ 3 M\_h\_p\_ecoli1  
NADTRHD\_ecoli1; 0.13514; forward; 0.13056; -8.3004; 1 M\_nad\_c\_ecoli1 + 1  
M\_nadph\_c\_ecoli1 -> 1 M\_nadh\_c\_ecoli1 + 1 M\_nadp\_c\_ecoli1  
O2tpp\_ecoli1; 0.35135; forward; NaN; NaN; 1 M\_o2\_p\_ecoli1 (<)-> 1  
M\_o2\_c\_ecoli1  
PGI\_ecoli1; 1; forward; 7.0102; -2.872; 1 M\_g6p\_c\_ecoli1 (<)-> 1  
M\_f6p\_c\_ecoli1  
PGK\_ecoli1; -0.56757; reverse; 19.3156; -2.872; 1 M\_13dpg\_c\_ecoli1 + 1  
M\_adp\_c\_ecoli1 (<)-> 1 M\_3pg\_c\_ecoli1 + 1 M\_atp\_c\_ecoli1  
PGM\_ecoli1; -0.56757; reverse; -4.5204; -2.872; 1 M\_3pg\_c\_ecoli1 (<)-> 1  
M\_2pg\_c\_ecoli1  
Plt2rpp\_ecoli1; 0.43243; forward; 0; -2.872; 1 M\_h\_p\_ecoli1 + 1 M\_pi\_p\_ecoli1  
(<)-> 1 M\_h\_c\_ecoli1 + 1 M\_pi\_c\_ecoli1

PPS\_ecoli1; 0.16554; forward; 0.41266; -27.5706; 1 M\_atp\_c\_ecoli1 + 1  
M\_h2o\_c\_ecoli1 + 1 M\_pyr\_c\_ecoli1 -> 1 M\_amp\_c\_ecoli1 + 2 M\_h\_c\_ecoli1 + 1  
M\_pep\_c\_ecoli1 + 1 M\_pi\_c\_ecoli1  
RPE\_ecoli1; -0.39865; reverse; -3.388; -2.872; 1 M\_xu5p\_D\_c\_ecoli1 (<)-> 1  
M\_ru5p\_D\_c\_ecoli1  
RPI\_ecoli1; 0.19932; forward; 4.4117; -2.872; 1 M\_r5p\_c\_ecoli1 (<)-> 1  
M\_ru5p\_D\_c\_ecoli1  
TALA\_ecoli1; -0.19932; reverse; 3.4773; -2.872; 1 M\_e4p\_c\_ecoli1 + 1  
M\_f6p\_c\_ecoli1 (<)-> 1 M\_g3p\_c\_ecoli1 + 1 M\_s7p\_c\_ecoli1  
TKT1\_ecoli1; -0.19932; reverse; -1.5468; -2.872; 1 M\_g3p\_c\_ecoli1 + 1  
M\_s7p\_c\_ecoli1 (<)-> 1 M\_r5p\_c\_ecoli1 + 1 M\_xu5p\_D\_c\_ecoli1  
TKT2\_ecoli1; -0.19932; reverse; -5.8438; -12.9378; 1 M\_f6p\_c\_ecoli1 + 1  
M\_g3p\_c\_ecoli1 (<)-> 1 M\_e4p\_c\_ecoli1 + 1 M\_xu5p\_D\_c\_ecoli1  
EXCHG\_ecoli1\_h\_p\_to\_h; 0.43243; forward; NaN; NaN; 1 M\_h\_p\_ecoli1 (<)-> 1  
M\_h\_exchg  
EXCHG\_ecoli1\_co2\_p\_to\_co2; 0.13514; forward; 0; -17.1231; 1 M\_co2\_p\_ecoli1  
(<)-> 1 M\_co2\_exchg  
EXCHG\_ecoli1\_kdo8p\_c\_to\_kdo8p; 0.73311; forward; 0; -24.549; 1  
M\_kdo8p\_c\_ecoli1 -> 1 M\_kdo8p\_exchg  
EXCHG\_ecoli1\_glc\_D\_p\_to\_glc\_D; -1; reverse; 0; -15.4049; 1 M\_glc\_D\_exchg  
(<)-> 1 M\_glc\_D\_p\_ecoli1  
EXCHG\_ecoli1\_h2o\_p\_to\_h2o; 1.3007; forward; NaN; NaN; 1 M\_h2o\_p\_ecoli1 (<)->  
1 M\_h2o\_exchg  
EXCHG\_ecoli1\_6pgc\_c\_to\_6pgc; -0.30068; reverse; 0; -2.872; 1 M\_6pgc\_exchg ->  
1 M\_6pgc\_c\_ecoli1  
EXCHG\_ecoli1\_pi\_p\_to\_pi; -0.43243; reverse; 0; -2.872; 1 M\_pi\_exchg (<)-> 1  
M\_pi\_p\_ecoli1  
EXCHG\_ecoli1\_o2\_p\_to\_o2; -0.35135; reverse; 0; -27.421; 1 M\_o2\_exchg (<)-> 1  
M\_o2\_p\_ecoli1  
EXCHG\_ecoli1\_dha\_c\_to\_dha; 0.60135; forward; 0; -2.872; 1 M\_dha\_c\_ecoli1 -> 1  
M\_dha\_exchg  
Active reactions associated with species ecoli2 (Reaction ID; Flux [in  
mmol/(gDW\*h)]; Direction; dG0 (adjusted to direction) [in kJ/mol]; dG [in  
kJ/mol]; Reaction string (adjusted to direction):  
ATPS4rpp\_ecoli2; 0.30068; forward; -33.8921; -2.872; 1 M\_adp\_c\_ecoli2 + 1  
M\_pi\_c\_ecoli2 + 4 M\_h\_p\_ecoli2 (<)-> 1 M\_atp\_c\_ecoli2 + 1 M\_h2o\_c\_ecoli2 + 3  
M\_h\_c\_ecoli2  
CYTB03\_4pp\_ecoli2; 0.30068; forward; -55.284; -50.4354; 4 M\_h\_c\_ecoli2 + 0.5  
M\_o2\_c\_ecoli2 + 1 M\_q8h2\_c\_ecoli2 -> 1 M\_h2o\_c\_ecoli2 + 4 M\_h\_p\_ecoli2 + 1  
M\_q8\_c\_ecoli2  
F6PA\_ecoli2; -0.60135; reverse; 15.8529; -2.872; 1 M\_g3p\_c\_ecoli2 + 1  
M\_dha\_c\_ecoli2 (<)-> 1 M\_f6p\_c\_ecoli2  
FBA\_ecoli2; 0.30068; forward; 22.3932; -2.872; 1 M\_fdp\_c\_ecoli2 (<)-> 1  
M\_g3p\_c\_ecoli2 + 1 M\_dhap\_c\_ecoli2  
G3PD2\_ecoli2; -0.10023; reverse; 25.6158; -47.9447; 1 M\_h\_c\_ecoli2 + 1  
M\_nadph\_c\_ecoli2 + 1 M\_dhap\_c\_ecoli2 (<)-> 1 M\_nadp\_c\_ecoli2 + 1  
M\_glyc3p\_c\_ecoli2  
G3PD5\_ecoli2; 0.10023; forward; -109.0556; -89.4499; 1 M\_glyc3p\_c\_ecoli2 + 1  
M\_q8\_c\_ecoli2 -> 1 M\_q8h2\_c\_ecoli2 + 1 M\_dhap\_c\_ecoli2  
G6PDH2r\_ecoli2; 0.30068; forward; -3.9232; -2.872; 1 M\_nadp\_c\_ecoli2 + 1  
M\_g6p\_c\_ecoli2 (<)-> 1 M\_h\_c\_ecoli2 + 1 M\_nadph\_c\_ecoli2 + 1 M\_6pgl\_c\_ecoli2

H2Otppecol i2; -0.30068; reverse; NaN; NaN; 1 M\_h2o\_c\_ecol i2 (<)-> 1  
M\_h2o\_p\_ecol i2  
NADH16ppecol i2; 0.20045; forward; -81.2018; -75.4941; 4 M\_h\_c\_ecol i2 + 1  
M\_nadh\_c\_ecol i2 + 1 M\_q8\_c\_ecol i2 (<)-> 1 M\_nad\_c\_ecol i2 + 3 M\_h\_p\_ecol i2 + 1  
M\_q8h2\_c\_ecol i2  
NADTRHD\_ecol i2; 0.20045; forward; 0.13056; -8.3004; 1 M\_nad\_c\_ecol i2 + 1  
M\_nadph\_c\_ecol i2 -> 1 M\_nadp\_c\_ecol i2 + 1 M\_nadh\_c\_ecol i2  
O2tppecol i2; 0.15034; forward; NaN; NaN; 1 M\_o2\_p\_ecol i2 (<)-> 1  
M\_o2\_c\_ecol i2  
PFK\_ecol i2; 0.30068; forward; -18.9474; -2.872; 1 M\_atp\_c\_ecol i2 + 1  
M\_f6p\_c\_ecol i2 -> 1 M\_adp\_c\_ecol i2 + 1 M\_h\_c\_ecol i2 + 1 M\_fdp\_c\_ecol i2  
PGI\_ecol i2; -0.30068; reverse; 7.0102; -2.872; 1 M\_f6p\_c\_ecol i2 (<)-> 1  
M\_g6p\_c\_ecol i2  
PGL\_ecol i2; 0.30068; forward; -22.5233; -5.3381; 1 M\_h2o\_c\_ecol i2 + 1  
M\_6pgl\_c\_ecol i2 -> 1 M\_h\_c\_ecol i2 + 1 M\_6pgc\_c\_ecol i2  
Plt2rppecol i2; 0.30068; forward; 0; -2.872; 1 M\_h\_p\_ecol i2 + 1 M\_pi\_p\_ecol i2  
(<)-> 1 M\_h\_c\_ecol i2 + 1 M\_pi\_c\_ecol i2  
TPI\_ecol i2; 0.30068; forward; 5.5753; -2.872; 1 M\_dhap\_c\_ecol i2 (<)-> 1  
M\_g3p\_c\_ecol i2  
EXCHG\_ecol i2\_h\_p\_to\_h; 0.30068; forward; NaN; NaN; 1 M\_h\_p\_ecol i2 (<)-> 1  
M\_h\_exchg  
EXCHG\_ecol i2\_h2o\_p\_to\_h2o; 0.30068; forward; NaN; NaN; 1 M\_h2o\_p\_ecol i2 (<)->  
1 M\_h2o\_exchg  
EXCHG\_ecol i2\_6pgc\_c\_to\_6pgc; 0.30068; forward; 0; -11.0652; 1 M\_6pgc\_c\_ecol i2  
-> 1 M\_6pgc\_exchg  
EXCHG\_ecol i2\_pi\_p\_to\_pi; -0.30068; reverse; 0; -15.6143; 1 M\_pi\_exchg (<)-> 1  
M\_pi\_p\_ecol i2  
EXCHG\_ecol i2\_o2\_p\_to\_o2; -0.15034; reverse; 0; -27.421; 1 M\_o2\_exchg (<)-> 1  
M\_o2\_p\_ecol i2  
EXCHG\_ecol i2\_dha\_c\_to\_dha; -0.60135; reverse; 0; -2.872; 1 M\_dha\_exchg -> 1  
M\_dha\_c\_ecol i2  
Active reactions of exchange compartment<->environment exchange reactions:  
EX\_C\_kdo8p\_exchg; 0.73311; forward; NaN; NaN; 1 M\_kdo8p\_exchg ->  
EX\_C\_h\_exchg; 0.73311; forward; NaN; NaN; 1 M\_h\_exchg (<)->  
EX\_C\_co2\_exchg; 0.13514; forward; NaN; NaN; 1 M\_co2\_exchg (<)->  
EX\_C\_glc\_\_D\_exchg; -1; reverse; NaN; NaN; (<)-> 1 M\_glc\_\_D\_exchg  
EX\_C\_h2o\_exchg; 1.6014; forward; NaN; NaN; 1 M\_h2o\_exchg (<)->  
EX\_C\_o2\_exchg; -0.50169; reverse; NaN; NaN; (<)-> 1 M\_o2\_exchg  
EX\_C\_pi\_exchg; -0.73311; reverse; NaN; NaN; (<)-> 1 M\_pi\_exchg

-Detailed solution of single-strain solution (recalculated back from community solution reactions)-

Active reactions associated with species ecol i1 (Reaction ID; Flux [in mmol/(gDW\*h)]; Direction; dGO (adjusted to direction) [in kJ/mol]; dG [in kJ/mol]; Reaction string (adjusted to direction):

A5PISO\_ecol i1; 0.74775; forward; -2.4481; -2.2737; 1 M\_ru5p\_\_D\_c\_ecol i1 (<)->  
1 M\_ara5p\_c\_ecol i1  
ATPS4rppecol i1; 0.74775; forward; -33.8921; -19.1979; 1 M\_adp\_c\_ecol i1 + 1  
M\_pi\_c\_ecol i1 + 4 M\_h\_p\_ecol i1 (<)-> 1 M\_atp\_c\_ecol i1 + 3 M\_h\_c\_ecol i1 + 1  
M\_h2o\_c\_ecol i1

C02tpp\_ecoli1; -0.018018; reverse; NaN; NaN; 1 M\_co2\_c\_ecoli1 (<)-> 1 M\_co2\_p\_ecoli1  
CYTB03\_4pp\_ecoli1; 0.78378; forward; -55.284; -74.9844; 4 M\_h\_c\_ecoli1 + 0.5 M\_o2\_c\_ecoli1 + 1 M\_q8h2\_c\_ecoli1 -> 1 M\_h2o\_c\_ecoli1 + 1 M\_q8\_c\_ecoli1 + 4 M\_h\_p\_ecoli1  
ENO\_ecoli1; 0.74775; forward; -3.8109; -2.2737; 1 M\_2pg\_c\_ecoli1 (<)-> 1 M\_h2o\_c\_ecoli1 + 1 M\_pep\_c\_ecoli1  
FBA\_ecoli1; 0.4955; forward; 22.3932; -2.2737; 1 M\_fdp\_c\_ecoli1 (<)-> 1 M\_dhap\_c\_ecoli1 + 1 M\_g3p\_c\_ecoli1  
G6PDH2r\_ecoli1; 0.018018; forward; -3.9232; -2.2737; 1 M\_g6p\_c\_ecoli1 + 1 M\_nadp\_c\_ecoli1 (<)-> 1 M\_6pgl\_c\_ecoli1 + 1 M\_h\_c\_ecoli1 + 1 M\_nadph\_c\_ecoli1  
GAPD\_ecoli1; 0.74775; forward; 4.6027; -2.2737; 1 M\_g3p\_c\_ecoli1 + 1 M\_nad\_c\_ecoli1 + 1 M\_pi\_c\_ecoli1 (<)-> 1 M\_13dpg\_c\_ecoli1 + 1 M\_h\_c\_ecoli1 + 1 M\_nadh\_c\_ecoli1  
GLCt2pp\_ecoli1; 1; forward; 0; -9.2065; 1 M\_glc\_\_D\_p\_ecoli1 + 1 M\_h\_p\_ecoli1 -> 1 M\_glc\_\_D\_c\_ecoli1 + 1 M\_h\_c\_ecoli1  
GND\_ecoli1; 0.018018; forward; 10.332; -45.7398; 1 M\_6pgc\_c\_ecoli1 + 1 M\_nadp\_c\_ecoli1 -> 1 M\_co2\_c\_ecoli1 + 1 M\_nadph\_c\_ecoli1 + 1 M\_ru5p\_\_D\_c\_ecoli1  
H2Otp\_ecoli1; -1.5135; reverse; NaN; NaN; 1 M\_h2o\_c\_ecoli1 (<)-> 1 M\_h2o\_p\_ecoli1  
HEX1\_ecoli1; 1; forward; -17.901; -2.2737; 1 M\_atp\_c\_ecoli1 + 1 M\_glc\_\_D\_c\_ecoli1 -> 1 M\_adp\_c\_ecoli1 + 1 M\_g6p\_c\_ecoli1 + 1 M\_h\_c\_ecoli1  
KDOPS\_ecoli1; 0.74775; forward; -66.5142; -28.9261; 1 M\_ara5p\_c\_ecoli1 + 1 M\_h2o\_c\_ecoli1 + 1 M\_pep\_c\_ecoli1 -> 1 M\_kdo8p\_c\_ecoli1 + 1 M\_pi\_c\_ecoli1  
NADH16pp\_ecoli1; 0.78378; forward; -81.2018; -50.9452; 4 M\_h\_c\_ecoli1 + 1 M\_nadh\_c\_ecoli1 + 1 M\_q8\_c\_ecoli1 (<)-> 1 M\_nad\_c\_ecoli1 + 1 M\_q8h2\_c\_ecoli1 + 3 M\_h\_p\_ecoli1  
NADTRHD\_ecoli1; 0.036036; forward; 0.13056; -8.3004; 1 M\_nad\_c\_ecoli1 + 1 M\_nadph\_c\_ecoli1 -> 1 M\_nadh\_c\_ecoli1 + 1 M\_nadp\_c\_ecoli1  
O2tpp\_ecoli1; 0.39189; forward; NaN; NaN; 1 M\_o2\_p\_ecoli1 (<)-> 1 M\_o2\_c\_ecoli1  
PFK\_ecoli1; 0.4955; forward; -18.9474; -12.3868; 1 M\_atp\_c\_ecoli1 + 1 M\_f6p\_c\_ecoli1 -> 1 M\_adp\_c\_ecoli1 + 1 M\_fdp\_c\_ecoli1 + 1 M\_h\_c\_ecoli1  
PGI\_ecoli1; 0.98198; forward; 7.0102; -2.2737; 1 M\_g6p\_c\_ecoli1 (<)-> 1 M\_f6p\_c\_ecoli1  
PGK\_ecoli1; -0.74775; reverse; 19.3156; -2.2737; 1 M\_13dpg\_c\_ecoli1 + 1 M\_adp\_c\_ecoli1 (<)-> 1 M\_3pg\_c\_ecoli1 + 1 M\_atp\_c\_ecoli1  
PGL\_ecoli1; 0.018018; forward; -22.5233; -21.4495; 1 M\_6pgl\_c\_ecoli1 + 1 M\_h2o\_c\_ecoli1 -> 1 M\_6pgc\_c\_ecoli1 + 1 M\_h\_c\_ecoli1  
PGM\_ecoli1; -0.74775; reverse; -4.5204; -2.2737; 1 M\_3pg\_c\_ecoli1 (<)-> 1 M\_2pg\_c\_ecoli1  
Plt2rpp\_ecoli1; 0.74775; forward; 0; -2.2737; 1 M\_h\_p\_ecoli1 + 1 M\_pi\_p\_ecoli1 (<)-> 1 M\_h\_c\_ecoli1 + 1 M\_pi\_c\_ecoli1  
RPE\_ecoli1; -0.48649; reverse; -3.388; -2.2737; 1 M\_xu5p\_\_D\_c\_ecoli1 (<)-> 1 M\_ru5p\_\_D\_c\_ecoli1  
RPI\_ecoli1; 0.24324; forward; 4.4117; -17.2002; 1 M\_r5p\_c\_ecoli1 (<)-> 1 M\_ru5p\_\_D\_c\_ecoli1  
TALA\_ecoli1; -0.24324; reverse; 3.4773; -2.2737; 1 M\_e4p\_c\_ecoli1 + 1 M\_f6p\_c\_ecoli1 (<)-> 1 M\_g3p\_c\_ecoli1 + 1 M\_s7p\_c\_ecoli1



TKT1\_ecoli i1; -0.24324; reverse; -1.5468; -2.2737; 1 M\_g3p\_c\_ecoli i1 + 1  
 M\_s7p\_c\_ecoli i1 (<)-> 1 M\_r5p\_c\_ecoli i1 + 1 M\_xu5p\_\_D\_c\_ecoli i1  
 TKT2\_ecoli i1; -0.24324; reverse; -5.8438; -2.2737; 1 M\_f6p\_c\_ecoli i1 + 1  
 M\_g3p\_c\_ecoli i1 (<)-> 1 M\_e4p\_c\_ecoli i1 + 1 M\_xu5p\_\_D\_c\_ecoli i1  
 TPI\_ecoli i1; 0.4955; forward; 5.5753; -2.2737; 1 M\_dhap\_c\_ecoli i1 (<)-> 1  
 M\_g3p\_c\_ecoli i1  
 EXCHG\_ecoli i1\_h\_p\_to\_h; 0.74775; forward; NaN; NaN; 1 M\_h\_p\_ecoli i1 (<)-> 1  
 M\_h\_exchg  
 EXCHG\_ecoli i1\_co2\_p\_to\_co2; 0.018018; forward; 0; -17.1231; 1 M\_co2\_p\_ecoli i1  
 (<)-> 1 M\_co2\_exchg  
 EXCHG\_ecoli i1\_kdo8p\_c\_to\_kdo8p; 0.74775; forward; 0; -24.549; 1  
 M\_kdo8p\_c\_ecoli i1 -> 1 M\_kdo8p\_exchg  
 EXCHG\_ecoli i1\_glc\_\_D\_p\_to\_glc\_\_D; -1; reverse; 0; -24.549; 1 M\_glc\_\_D\_exchg  
 (<)-> 1 M\_glc\_\_D\_p\_ecoli i1  
 EXCHG\_ecoli i1\_h2o\_p\_to\_h2o; 1.5135; forward; NaN; NaN; 1 M\_h2o\_p\_ecoli i1 (<)->  
 1 M\_h2o\_exchg  
 EXCHG\_ecoli i1\_pi\_p\_to\_pi; -0.74775; reverse; 0; -15.4049; 1 M\_pi\_exchg (<)-> 1  
 M\_pi\_p\_ecoli i1  
 EXCHG\_ecoli i1\_o2\_p\_to\_o2; -0.39189; reverse; 0; -39.9538; 1 M\_o2\_exchg (<)-> 1  
 M\_o2\_p\_ecoli i1  
 Active reactions of exchange compartment<->environment exchange reactions:  
 EX\_C\_kdo8p\_exchg; 0.74775; forward; NaN; NaN; 1 M\_kdo8p\_exchg ->  
 EX\_C\_h\_exchg; 0.74775; forward; NaN; NaN; 1 M\_h\_exchg (<)->  
 EX\_C\_co2\_exchg; 0.018018; forward; NaN; NaN; 1 M\_co2\_exchg (<)->  
 EX\_C\_glc\_\_D\_exchg; -1; reverse; NaN; NaN; (<)-> 1 M\_glc\_\_D\_exchg  
 EX\_C\_h2o\_exchg; 1.5135; forward; NaN; NaN; 1 M\_h2o\_exchg (<)->  
 EX\_C\_o2\_exchg; -0.39189; reverse; NaN; NaN; (<)-> 1 M\_o2\_exchg  
 EX\_C\_pi\_exchg; -0.74775; reverse; NaN; NaN; (<)-> 1 M\_pi\_exchg
